# Supplementary material for: Optimised Degradation of Lignocelluloses by Edible Filamentous Fungi for the Efficient Biorefinery of Sugar Beet Pulp
Source: MDPI journal article supplement (doi:10.3390/polym16091178), 2024-04-23
Supplement: s1 [file s1]

# Optimised Degradation of Lignocelluloses by Edible Filamentous Fungi for the Efficient Biorefinery of Sugar Beet Pulp

Zydrune Gaizauskaite <sup>1,2,\*</sup>, Renata Zvirdauskiene <sup>1</sup>, Mantas Svazas <sup>3</sup>, Loreta Basinskiene <sup>1</sup> and Daiva Zadeike <sup>1,\*</sup>

<sup>1</sup> Department of Food Science and Technology, Faculty of Chemical Technology, Kaunas University of Technology, 50254 Kaunas, Lithuania

<sup>2</sup> Food Institute, Kaunas University of Technology, 50254 Kaunas, Lithuania

<sup>3</sup> Department of Applied Economics, Finance and Accounting, Agriculture Academy of Vytautas Magnus University, 53361 Kaunas, Lithuania

\* Correspondence: zydrune.gaizauskaite@ktu.lt (Z.G.); daiva.zadeike@ktu.lt (D.Z.)

---

## Supplementary Materials

### S1. Chemical analysis

The raw material was analysed for moisture, fibre, protein, sucrose, and ash contents according to the AOAC Official Methods [51]. For the moisture content determination an oven-drying method was used (drying at 135 °C for 2 h) (method 930.15). The crude protein content was determined by the Kjeldahl nitrogen (method 920.152, nitrogen to protein conversion factor was 6.25). Sucrose was determined according to the method 942.20.

### S2. Determination of soluble and insoluble dietary fibre

The quantification of soluble (SDF) and insoluble (IDF) dietary fibres was measured by using an integrated total dietary fibre assay procedure (K-TDFR, Megazyme, Co. Wicklow, Ireland), including the key attributes of the validated AOAC Official Methods 2002.02, 985.29, and 991.43 [51]. Shortly, powdered SBP sample ( $1.00 \pm 0.01$  g) was mixed with MES-TRIS (2(N-morpholino)ethanesulfonic acid tris(hydroxymethyl)aminomethane) buffer (pH 8.2) and subjected to sequential enzymatic hydrolysis by heat-stable  $\alpha$ -amylase (100 °C; 30 min). After amylase hydrolysis, sample was cooled to 60 °C and hydrolysed with protease (60 °C; 30 min). Further, the pH was adjusted to 4.8 and sample was hydrolysed with amyloglucosidase for 30 min., filtered using a vacuum through the crucible and washed twice with 60°C deionised water. The filtrate was collected and used for the SDF determination. SDF was precipitated from filtrate with 95% ethanol heated to 60 °C and recovered on the crucible by washing with distilled water, 78% ethanol, 95% ethanol, and acetone. For the determination of IDF, the sediment after enzymatic hydrolysis was then further washed with 95% ethanol and acetone. Crucibles containing residues were dried overnight in 105 °C oven and weighed. Obtained SDF and IDF contents were corrected for protein and ash. The content of each fibre was expressed as g/100 g d.w. of SBP. The analysis were performed in triplicate.

---

### S3. Lignin determination

The determination of acid-insoluble lignin was based on the NREL methodology [52]. Some modifications have been made to the sample size and heating procedure [53]. The sample was prepared by mixing  $1.0 \pm 0.01$  g ( $m_0$ ) of the SPB sample with  $15.00 \pm 0.01$  mL of 72% sulfuric acid and kept in a  $30^\circ\text{C}$  water bath for 1 h. Then, 575 mL of deionised water were added, and the sample was boiled under reflux for 4 h. After heating, the solution was filtered through a pre-weighted fritted glass filter ( $m_1$ ) and washed with boiling water until neutral pH (7.0). The neutralised filter was then oven-dried overnight at  $105^\circ\text{C}$  and weighed ( $m_2$ ). Insoluble lignin was calculated according to the eq.:

$$\text{Insoluble lignin, \%} = \frac{m_2 - m_1}{m_0} \times 100 \quad (1)$$

where:  $m_0$  – initial sample weight, g;  $m_1$  – initial filter weight, g;  $m_2$  – final dry weight, g.

### Figures and Tables

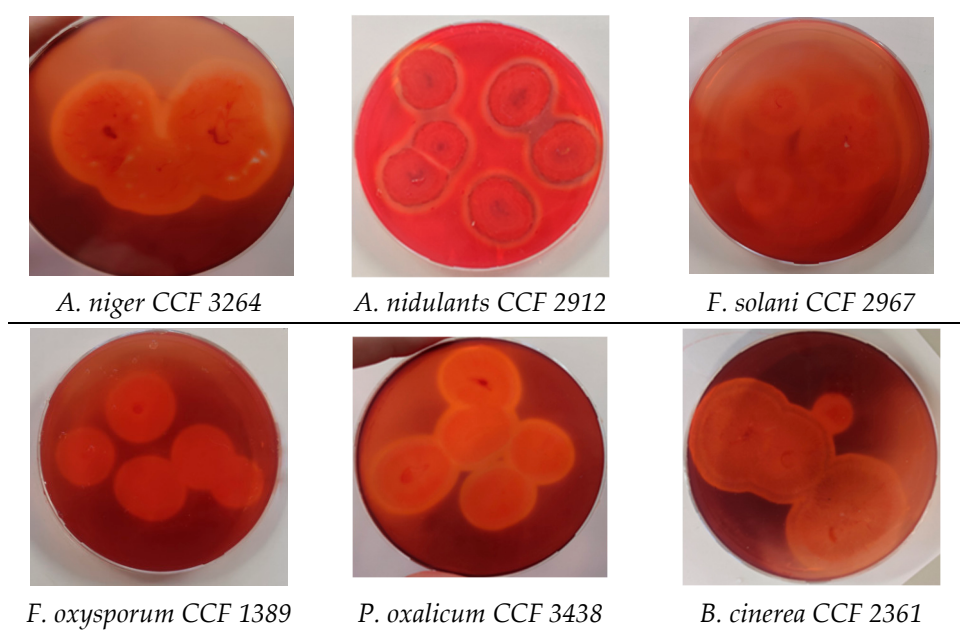

**Figure S1.** Hydrolytic activity of tested fungal strains on CMC-based agar.

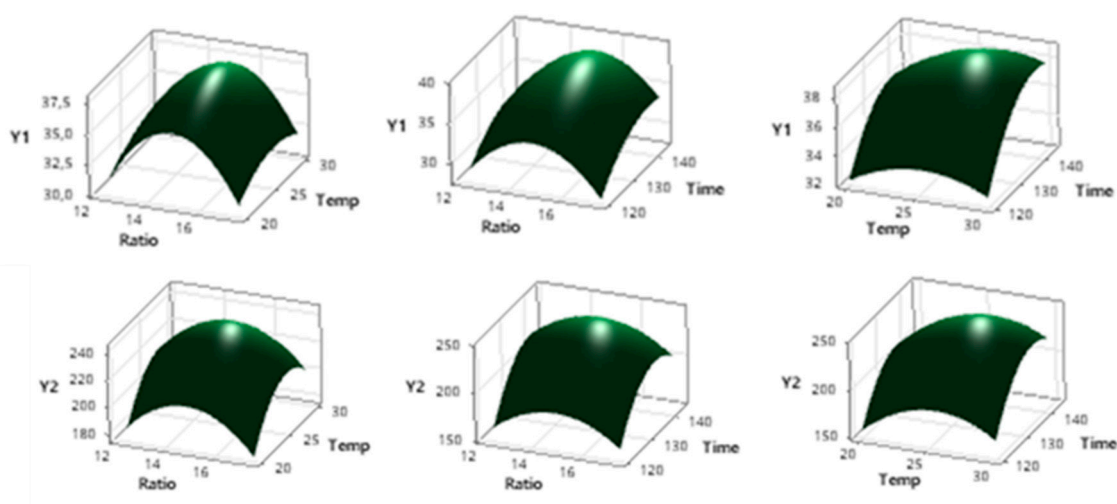

**Figure S2.** Response surface plots of the interactions between process parameters for RS yield (Y1) and cellulase activity (Y2).

**Table S1.** Coded coefficients of the mathematical models for Y1 and Y2 responses.

| Model Y1    |        |         |         |         | Model Y2 |         |         |         |
|-------------|--------|---------|---------|---------|----------|---------|---------|---------|
| Term        | Coef   | SE Coef | T-Value | P-Value | Coef     | SE Coef | T-Value | P-Value |
| Constant    | 37.909 | 0.235   | 161.25  | 0.000   | 6.5285   | 0.0181  | 361.65  | 0.000   |
| Ratio       | -0.167 | 0.216   | -0.77   | 0.458   | -0.0601  | 0.0200  | -3.00   | 0.013   |
| Time        | 0.527  | 0.216   | 2.44    | 0.035   | 0.5148   | 0.0193  | 26.64   | 0.000   |
| Temp        | 2.150  | 0.216   | 9.94    | 0.000   | 0.2300   | 0.0193  | 11.90   | 0.000   |
| Ratio*Ratio | -5.152 | 0.412   | -12.49  | 0.000   | -0.6164  | 0.0318  | -19.36  | 0.000   |
| Time*Time   | -1.462 | 0.412   | -3.55   | 0.005   | -0.8661  | 0.0318  | -27.21  | 0.000   |
| Temp*Temp   | -1.747 | 0.412   | -4.24   | 0.002   | -0.6651  | 0.0318  | -20.89  | 0.000   |
| Ratio*Time  | -0.010 | 0.242   | -0.04   | 0.968   | -0.1997  | 0.0232  | -8.59   | 0.000   |
| Ratio*Temp  | 0.535  | 0.242   | 2.21    | 0.051   | 0.1961   | 0.0232  | 8.44    | 0.000   |
| Time*Temp   | 0.440  | 0.242   | 1.82    | 0.099   | -0.0823  | 0.0223  | -3.69   | 0.004   |

**Table S2.** ANOVA of mathematical models.

| Mathematical model for Y1 |                                    |       |                                     |         | Mathematical model for Y2 |                                    |         |                                     |
|---------------------------|------------------------------------|-------|-------------------------------------|---------|---------------------------|------------------------------------|---------|-------------------------------------|
| Term                      | Estimated Value                    | SE    | T-Value                             | P-Value | Estimated Value           | SE                                 | T-Value | P-Value                             |
| Const.                    | 37.909                             | 0.235 | 161.25                              | 0.000   | 6.5285                    | 0.0181                             | 361.65  | 0.000                               |
| X1                        | -0.167                             | 0.216 | -0.77                               | 0.045   | -0.0601                   | 0.0200                             | -3.00   | 0.013                               |
| X2                        | 2.150                              | 0.216 | 9.94                                | 0.000   | 0.5148                    | 0.0193                             | 26.64   | 0.000                               |
| X3                        | 0.527                              | 0.216 | 2.44                                | 0.035   | 0.2300                    | 0.0193                             | 11.90   | 0.000                               |
| X1 <sup>2</sup>           | -5.152                             | 0.412 | -12.49                              | 0.000   | -0.6164                   | 0.0318                             | -19.36  | 0.000                               |
| X2 <sup>2</sup>           | -1.747                             | 0.412 | -4.24                               | 0.002   | -0.8661                   | 0.0318                             | -27.21  | 0.000                               |
| X3 <sup>2</sup>           | -1.462                             | 0.412 | -3.55                               | 0.005   | -0.6651                   | 0.0318                             | -20.89  | 0.000                               |
| X1X3                      | -0.010                             | 0.242 | -0.04                               | 0.968   | -0.1997                   | 0.0232                             | -8.59   | 0.000                               |
| X1X2                      | 0.535                              | 0.242 | 2.21                                | 0.051   | 0.1961                    | 0.0232                             | 8.44    | 0.000                               |
| X2X3                      | 0.440                              | 0.242 | 1.82                                | 0.049   | -0.0823                   | 0.0223                             | -3.69   | 0.004                               |
| <b>R<sup>2</sup></b>      | <b>R<sup>2</sup><sub>adj</sub></b> |       | <b>R<sup>2</sup><sub>pred</sub></b> |         | <b>R<sup>2</sup></b>      | <b>R<sup>2</sup><sub>adj</sub></b> |         | <b>R<sup>2</sup><sub>pred</sub></b> |
| 98.59%                    | 97.32%                             |       | 92.41%                              |         | 98.89%                    | 97.89%                             |         | 96.99%                              |
| <i>Lack of fit</i>        | <b>F-Value</b>                     |       | <b>P-Value</b>                      |         | <i>Lack of fit</i>        | <b>F-Value</b>                     |         | <b>P-Value</b>                      |
|                           | 6.81                               |       | 0.089                               |         |                           | 53.61                              |         | 0.985                               |
